# Supplementary material
Source: publisher figshare collection journal article supplement (https://gsajournals.figshare.com/ndownloader/files/21930645)
Supplement: Supplementary file 1 [file 21930645]

## Sheet: Design Details
	nCounter Elements Design Details
	Customer Name	Accession	Position	Target Sequence
	pmp-3	NM_074219.2	1473-1572	TGTCATTGGCGTCGACTCACTTCAAATCTGTTCTTCCTGGCTCAAAAACCATATTTCCCATCTGGAAACACCACTCTGCGACAACAAATCGTATATCCAG
	Y45F10D.4	NM_070257.2	38-137	CCGCGAAAACACTCCTGCACAAGTTTGCGTTGCCAGCGGCAACTTCAGTTGCTCAGTATCACGAGAAGGTTATCGATCACTACGAGAACCCGCGAAATGT
	cdc-42	NM_063197.6	448-547	AATTGAAAGCAGTGAAATACGTTGAATGCTCAGCGTTGACGCAGAAGGGACTGAAAAATGTATTCGACGAAGCCATTCTGGCCGCTCTCGACCCACCACA
	rol-6	NM_063457.3	459-558	AGCTGGACCAGAAGGAGAGGAAGGACCAGATGGGCACGATGGACAAGACGGAGTCCCAGGATTTGACGGAAAAGATGCCGAAGATGTTCAAAACACCCCA
	lon-3	NM_073660.5	265-364	TTCCCACAAGGAGACAAGGGACCACTTCCAGTTCCTGGACTTCCATTTGGACCAAATGTTTCTGGTGGAAGTGATCGATGCCAGTGTACTGTGGAGAATA
	sqt-3	NM_001269484.1	178-277	GGAACTCCAGGAACCCCAGGAAAGCCACCAGTTGCCCCATGTGAGCCAACTACTCCACCACCATGCAAGCCATGCCCACAAGGACCACCAGGACCACCAG
	sqt-1	NM_064020.5	114-213	GCTTGATACCGAGATGAATGTGTTCAGACAATCTACCAATGGATTGTGGAAGGACATAGTTGTCATCGGAAGATCTAGCAAGCGTGTCCGTCGTCAATAT
	dpy-17	NM_065685.5	276-375	CCCAGGAGGCCCACAAGGACACTTCCCAGGAAATACTGGATCATCGAACACCCCAACTCTTCCAGGAGTTATTGGAGTTCCACCATCAGTTACTGGACAT
	col-123	NM_069355.3	274-373	GGAGATTACAAGGAAGCTCCACCTCCAACTTCTTATCCATCATCTGGCGGATATGATGAACCATCTGCTCCTGCTCACGATACTGCACCACAGGCACCTG
	col-74	NM_062758.5	575-674	TGCGTGGAGCTCGCGGACAAGGAGCCATGCCAGGACGTGACGGAACTCCAGGACAGCCAGGAAGCCTCGGACCAGTCGGACCAGTCGGACCACAAGGAGA
	col-113	NM_068722.5	474-573	ACCAACTGGACCACCTGGAGAAACTGGGCCATCTGGACCAGAAGGACCACCAGGAAACCCAGGAAGAATTGGAGAACATGGACGTGAAGGATATCCAGGA
	dpy-3	NM_075994.4	242-341	GTCGCACACGTCGTGATAACTATGGAGCACAACCAATTGCCGCCAATCCACCATCTTCCGCTGCTGGATCTTGCTGTACTTGTCAAGTTGGACCACCAGG
	dpy-13	NM_068118.5	179-278	TCTGGGCTGATGTCCACCATCTCCGTGTCGATGCCGCCTCCAACCGTACCGCCCGTGCCGTTCGTTACGGACGTGACGACGCCGCTGCTGGAAACGGACC
	eaf-1	NM_059003.5	72-171	ACGGAAAAGTGACCCTAAGGCAGAGCAATTTCACACGCTAAGATACGATTTCAAGCCAAGCTCTGTATCAAACAATGCCGACACCTTCATAGCGTTTGGG
	ell-1	NM_001313056.1	455-554	GCTCCACTGCGTCGAGCCGAGTCTCATCGCCAGCTTCATCTCTCTCGTCACCGAGTCAACCATCGTGTAACTGGGAGAAACAGTTTGGAGATATTAAGAC
	dpy-11	NM_072254.4	408-507	CAAGCATCCAAACTCTAAGCAAATGGCCGTCGTTGCCGTCTTCTTCAAACTTTCGATGTCGGTTCGTGACTTGCACAACCATCTCGTCGAAGATAAGGGA
	col-19	NM_001038488.3	26-125	CCTGCGGAGTACTTGTGTGCGTTCTTGCCTCGCTTTACACCATCGGAAACCTTCTCAATGAGATCGAGGAGCTTCAAGTTGAGTTCCAGGATGGTATGGT
	col-141	NM_072334.1	163-262	GGACTCGAACAAAACGCATGGAGATCAATGATTCCATCCACTCGTCCTGTCAACGCCGAATCACTTCTTCTTGGGCGTAATAAGAGACAAGCCCAATGCA
	col-142	NM_072335.6	871-970	GCTCGTTCCCGTGTTGTTGCTCGTTCTCGCGTCGTGGCTCGCAATCGTGTTGCCGCCAAGAGACGTGCCGCTGTCAGAAGACACCGCGTCCAGAAGGCTG
	col-41	NM_078121.3	519-618	CCCAGGACAGGAGGGAGCCCCAGGAGATCAAGGAGAACAAGGACCAAAGGGATACGATGGGACCGACGGACCAGACGGACAGCCAGGAACCACATACTTC
	dpy-7	NM_076873.4	363-462	AGGAAAGCCTGGACTTGATGGGCTTGATGTACCACTCGATCCAGAACCAGCATTCCCATGCGTAATTTGTCCGGCTGGCCCACCAGGAACTCGAGGACCA
	dpy-2	NM_062966.5	665-764	GACCAATTGGAGATAAGGGAAGAACACCAGAAGCACATGTTATTCCAGGACCACCTGGAGATTCTGGATTACCAGGACCATGGGGACCACCAGGATCAGC
	dbl-1	NM_072308.4	92-191	CAATCTGTTTCCACATTCCCTACGATATGTCCAGTGGCTGCCTGATGCGCCCAACTCAACTATGAACGACTCTGTGCGGACAACTACAACGATTTCAAGC
	ama-1	NM_068122.6	3270-3369	AGAGCCAGCTACTCAGATGACACTCAACACGTTCCATTATGCAGGAGTTTCGGCGAAGAATGTGACACTTGGAGTGCCGAGATTGAAGGAGATTATCAAT

## Sheet: Nanostring Probes
Name	Reporter probe	Capture probe
pmp-3	GGTTTTTGAGCCAGGAAGAACAGATTTGAAGTGAGTCGACGCCAATGACACCTCAAGACCTAAGCGACAGCGTGACCTTGTTTCA	CGAAAGCCATGACCTCCGATCACTCCTGGATATACGATTTGTTGTCGCAGAGTGGTGTTTCCAGATGGGAAATAT
Y45F10D.4	AACTGAAGTTGCCGCTGGCAACGCAAACTTGTGCAGGAGTGTTTTCGCGGCATCCTCTTCTTTTCTTGGTGTTGAGAAGATGCTC	CGAAAGCCATGACCTCCGATCACTCACATTTCGCGGGTTCTCGTAGTGATCGATAACCTTCTCGTGATACTGAGC
cdc-42	TCCCTTCTGCGTCAACGCTGAGCATTCAACGTATTTCACTGCTTTCAATTCACAATTCTGCGGGTTAGCAGGAAGGTTAGGGAAC	CGAAAGCCATGACCTCCGATCACTCTGTGGTGGGTCGAGAGCGGCCAGAATGGCTTCGTCGAATACATTTTTCAG
rol-6	CGTCTTGTCCATCGTGCCCATCTGGTCCTTCCTCTCTGTTGAGATTATTGAGCTTCATCATGACCAGAAG	CGAAAGCCATGACCTCCGATCACTCTGGGGTGTTTTGAACATCTTCGGCATCTTTTCCGTCAAATCCTGGGACTC
lon-3	CCAAATGGAAGTCCAGGAACTGGAAGTGGTCCCTTGTCTCCTTGTGGGAACAAAGACGCCTATCTTCCAGTTTGATCGGGAAACT	CGAAAGCCATGACCTCCGATCACTCTATTCTCCACAGTACACTGGCATCGATCACTTCCACCAGAAACATTTGGT
sqt-3	GTTGGCTCACATGGGGCAACTGGTGGCTTTCCTGGGGTTCCGAACCTAACTCCTCGCTACATTCCTATTGTTTTC	CGAAAGCCATGACCTCCGATCACTCTGGTGGTCCTTGTGGGCATGGCTTGCATGGTGGTGGAGTA
sqt-1	TCCACAATCCATTGGTAGATTGTCTGAACACATTCATCTCGGTATCAAGCCCAATTTGGTTTTACTCCCCTCGATTATGCGGAGT	CGAAAGCCATGACCTCCGATCACTCATATTGACGACGGACACGCTTGCTAGATCTTCCGATGACAACTATGTCCT
dpy-17	TGTTCGATGATCCAGTATTTCCTGGGAAGTGTCCTTGTGGCTTTCGGGTTATATCTATCATTTACTTGACACCCT	CGAAAGCCATGACCTCCGATCACTCATGTCCAGTAACTGATGGTGGAACTCCAATAACTCCTGGAAGAGTTGGGG
col-123	CCGCCAGATGATGGATAAGAAGTTGGAGGTGGAGCTTCCTTGTAATCTCAACAGCCACTTTTTTTCCAAATTTTGCAAGAGCC	CGAAAGCCATGACCTCCGATCACTCTGGTGCAGTATCGTGAGCAGGAGCAGATGGTTCATCATAT
col-74	TGGAGTTCCGTCACGTCCTGGCATGGCTCCTTGTCCGCGAGCACCGTGTGGACGGCAACTCAGAGATAACGCATAT	CGAAAGCCATGACCTCCGATCACTCCGACTGGTCCGACTGGTCCGAGGCTTCCTGGCTGTCC
col-113	GTGGTCCTTCTGGTCCAGATGGCCCAGTTTCTCCACCTGGAGTTTATGTATTGCCAACGAGTTTGTCTTT	CGAAAGCCATGACCTCCGATCACTCTCCTGGATATCCTTCACGTCCATGTTCTCCAATTCTTCCTGGGTTTCCTG
dpy-3	TGGATTGGCGGCAATTGGTTGTGCTCCATAGTTATCACGACGTGCAGATAAGGTTGTTATTGTGGAGGATGTTACTACA	CGAAAGCCATGACCTCCGATCACTCCTGGTGGTCCAACTTGACAAGTACAGCAAGATCCAGCAGCGGAAGATGG
dpy-13	GGTACGGTTGGAGGCGGCATCGACACGGAGATGGTGCTTCCTTCCTGTGTTCCAGCTACAAACTTAGAAAC	CGAAAGCCATGACCTCCGATCACTCGCGGCGTCGTCACGTCCGTAACGAACGGCACGGGC
eaf-1	AATCGTATCTTAGCGTGTGAAATTGCTCTGCCTTAGGGTCACTTTTCCGCATAAAATTGGTTTTGCCTTTCAGCAATTCAACTT	CGAAAGCCATGACCTCCGATCACTCCCCAAACGCTATGAAGGTGTCGGCATTGTTTGATACAGAGCTTGGCTTGA
ell-1	TGACGAGAGAGATGAAGCTGGCGATGAGACTCGGCTCGACGCAGTGGAGCTGGTCAAGACTTGCATGAGGACCCGCAAATTCCT	CGAAAGCCATGACCTCCGATCACTCGTCTTAATATCTCCAAACTGTTTCTCCCAGTTACACGATGGTTGACTCGG
dpy-11	GTTTGAAGAAGACGGCAACGACGGCCATTTGCTTAGAGTTTGGATGCTTGCTTTCGTTGGGACGCTTGAAGCGCAAGTAGAAAAC	CGAAAGCCATGACCTCCGATCACTCTCCCTTATCTTCGACGAGATGGTTGTGCAAGTCACGAACCGACATCGAAA
col-19	GTTTCCGATGGTGTAAAGCGAGGCAAGAACGCACACAAGTACTCCGCAGGCCAGCAGACCTGCAATATCAAAGTTATAAGCGCGT	CGAAAGCCATGACCTCCGATCACTCACCATACCATCCTGGAACTCAACTTGAAGCTCCTCGATCTCATTGAGAAG
col-141	ACAGGACGAGTGGATGGAATCATTGATCTCCATGCGTTTTGTTCGAGTCCCTGCCAATGCACTCGATCTTGTCATTTTTTTGCG	CGAAAGCCATGACCTCCGATCACTCTGCATTGGGCTTGTCTCTTATTACGCCCAAGAAGAAGTGATTCGGCGTTG
col-142	ACACGATTGCGAGCCACGACGCGAGAACGAGCAACAACACGGGAACGAGCCAAACTGGAGAGAGAAGTGAAGACGATTTAACCCA	CGAAAGCCATGACCTCCGATCACTCCTTCTGGACGCGGTGTCTTCTGACAGCGGCACGTCTCTTGGCGGCA
col-41	CCTTTGGTCCTTGTTCTCCTTGATCTCCTGGGGCTCCGATTGCTGCATTCCGCTCAACGCTTGAGGAAGTA	CGAAAGCCATGACCTCCGATCACTCCTGGCTGTCCGTCTGGTCCGTCGGTCCCATCGTATC
dpy-7	CTGGTTCTGGATCGAGTGGTACATCAAGCCCATCAAGTCTGAGGCTGTTAAAGCTGTAGCAACTCTTCCACGA	CGAAAGCCATGACCTCCGATCACTCCGAGTTCCTGGTGGGCCAGCCGGACAAATTACGCATGGGAATG
dpy-2	TCCTGGAATAACATGTGCTTCTGGTGTTCTTCCCTTATCTCCAATTGGTCCTAGGACGCAAATCACTTGAAGAAGTGAAAGCGAG	CGAAAGCCATGACCTCCGATCACTCTGGTCCCCATGGTCCTGGTAATCCAGAATCTCCAGGTGG
dbl-1	GCGCATCAGGCAGCCACTGGACATATCGTAGGGAATGTGGAAACAGATTGCCACGCGATGACGTTCGTCAAGAGTCGCATAATCT	CGAAAGCCATGACCTCCGATCACTCCTTGAAATCGTTGTAGTTGTCCGCACAGAGTCGTTCATAGTTGAGTTGG
ama-1	AAACTCCTGCATAATGGAACGTGTTGAGTGTCATCTGAGTAGCTGGCTCTCATTTGGAATGATGTGTACTGGGAATAAGACGACG	CGAAAGCCATGACCTCCGATCACTCATTGATAATCTCCTTCAATCTCGGCACTCCAAGTGTCACATTCTTCGCCG

## Sheet: RNAi sequences
Target	Target sequence	size
dpy-13	TCCGGAATCGAAGTTTGGTCCGTCTCCAGCAGCGGCGTCGTCACGTCCGTAACGAACGGCACGGGCGGTACGGTTGGAGGCGGCATCGACACGGAGATGGTGGACATCAGCCCAGACGTCCTTCATGGATCCCTTGCAGGTAAG	144 bp
lon-3	CCAGGAAAGGATGCTGAGTACTGTAAGTGCCCAACGCGTGACGACGGAGGCAACAGCCACAGAGCATGGCGCCGTAAGCACAAGAGAGTCTACTAGACGACAACAGATAGTTTTATATCTAACTTTAAATTTTAATTTCGCTGATGATAATAATAAAAAGTTATATCGGTTATATCGG	178bp
sqt-1	TCAACCTCCGAGTAGATGGTTGACATGGTCATGAAGCATACCATAAGAGTGGCGACAGTGACCGAAGCCGTCACATAACACGCAAGTTTTACAGACATCT	100 bp
